# Supplementary material for: Constructing porous intramolecular donor–acceptor integrated carbon nitride doped with m-aminophenol for boosting photocatalytic degradation and hydrogen evolution activity
Source: Royal Society of Chemistry journal article supplement (doi:10.1039/d2cy00897a), 2022-01-01
Supplement: d2cy00897a1.pdf [file d2cy00897a1.pdf]

# Electronic Supplementary Information for

## Constructing porous intramolecular donor-acceptor integrated carbon nitride with m-aminophenol doped for boosting photocatalytic degradation and hydrogen evolution activity

Tiantian Li<sup>a, d</sup>, Jingmin Shi<sup>a, d</sup>, Zhixue Liu<sup>a, d</sup>, Wei Xie<sup>a, d</sup>, Keyu Cui<sup>a, d</sup>, Bo Hu<sup>a, d</sup>, Guangbo Che<sup>a, b, c</sup>, Liang Wang<sup>a, d, \*</sup>, Tianyu Zhou<sup>a, b, c, \*</sup>, Chunbo Liu<sup>a, b, c, \*</sup>

*a Key Laboratory of Preparation and Application of Environmental Friendly Materials, Ministry of Education, Jilin Normal University,*

*Changchun 130103, P.R. China*

*b College of Environmental Science and Engineering, Jilin Normal University, Siping 136000, P.R. China*

*c Key Laboratory of Environmental Materials and Pollution Control, The Education Department of Jilin Province, Jilin Normal University, Siping*

*136000, P.R. China*

*d College of chemistry, Jilin Normal University, Siping 136000, P.R. China*

*e School of chemistry, Baicheng Normal University, Baicheng 137099, P.R. China*

## Contents

### Materials

### Characterization

**Fig. S1** Solid-state <sup>13</sup>C NMR spectra in CN and CN<sub>30</sub>.

**Fig. S2** SEM mapping images of CN<sub>30</sub>.

**Fig. S3** N<sub>2</sub> adsorption-desorption isotherms and pore size distribution curves (**inset**) of CN and CN<sub>30</sub>.

**Fig. S4** Degradation performance of CN<sub>30</sub> towards rhodamine B, methylene blue, bisphenol A.

**Fig. S5** Mass spectra of the degradation of TC over CN<sub>30</sub> sample at (a) 2.56 min, (b) 3 min, (c) 6.37 min, (d) 6.84 min, (e) 8.29 min and (f) 8.79 min.

---

\* Corresponding author: Liang Wang (wangliang7469@163.com) Tianyu Zhou (tianyuzhou@jlnu.edu.cn)  
Chunbo Liu (chunboliu@jlnu.edu.cn)

## **Materials**

Urea, tetracycline (TC), m-aminophenol, aniline, phenol and triethanolamine (TEOA) were achieved from Aladdin Reagent Co., Ltd. Isopropanol (IPA), ascorbic acid (AA), EDTA-2Na and  $\text{H}_2\text{PtCl}_6 \cdot 6\text{H}_2\text{O}$  were given from Sinopharm Chemical Reagent Co., Ltd. Unless otherwise specified, all reagents in the whole experiments are analytical pure reagents without treatment.

## **Characterization**

The crystalline phase structure of the products was recorded by Rigaku (Japan) D/Max 2500 X-ray diffractometry (XRD). The fourier transform infrared spectrum (FT-IR) of the photocatalysts were obtained by thermoscientific Nicolet 4700 FT-IR spectrometer. The morphology and microstructure were observed by field emission scanning electron microscopy (FESEM, Hitachi regulus 8100) and transmission electron microscopy (TEM, JEM-2100F). The X-ray photoelectron spectroscopy (XPS) was tested by ESCALAB250XI electronic spectrometer (VG scientific, USA). Photoluminescence spectra (PL) of the products were measured by F4500 (Hitachi, Japan) PL detector. UV-vis diffuse reflectance spectrum (UV-vis DRS) was conducted on a Cary 500 spectrometer (Shimadzu UV-2550, Japan). The photocurrent response (PCR), electrochemical impedance spectroscopy (EIS) and Mott-Schottky test were performed on three-electrode system using an electrochemical workstation (Chenhua workstation CHI600E).

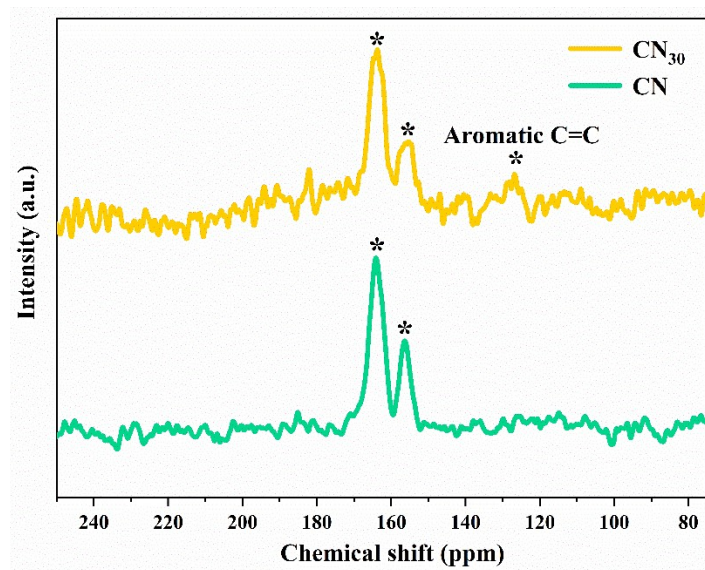

**Fig. S1** Solid-state  $^{13}\text{C}$  NMR spectra in  $\text{CN}$  and  $\text{CN}_{30}$ .

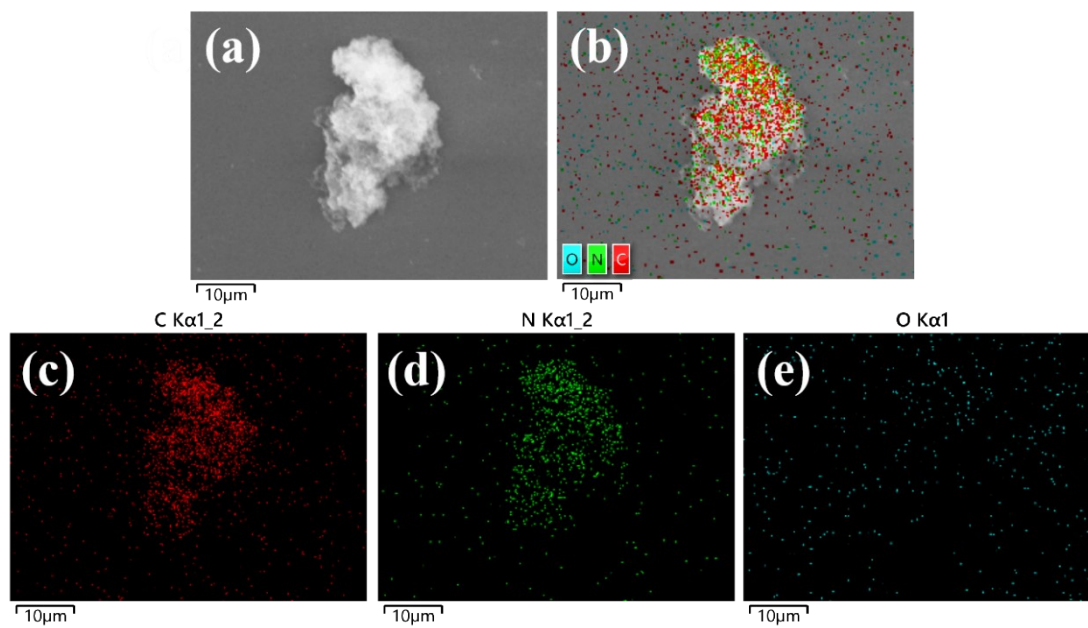

**Fig. S2** SEM mapping images of  $CN_{30}$ .

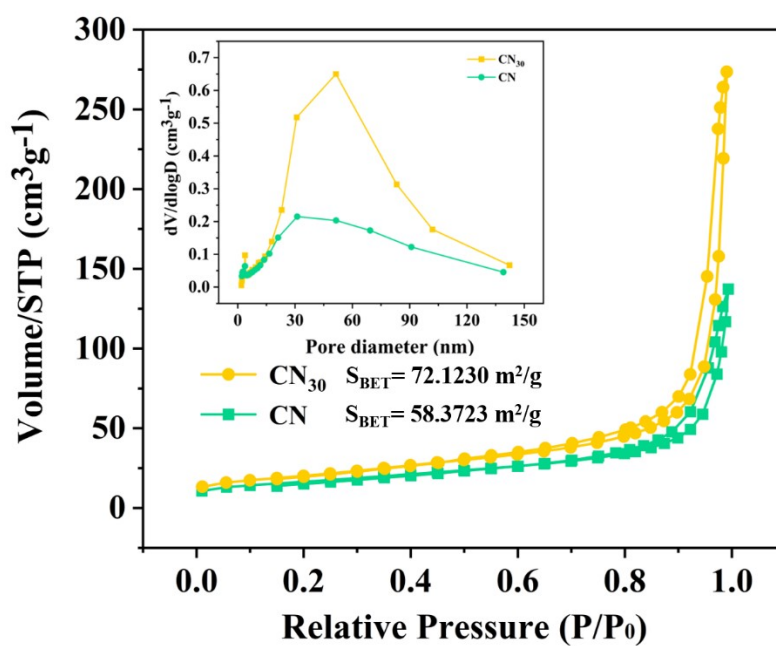

**Fig. S3** N<sub>2</sub> adsorption-desorption isotherms and pore size distribution curves (**inset**) of CN and CN<sub>30</sub>.

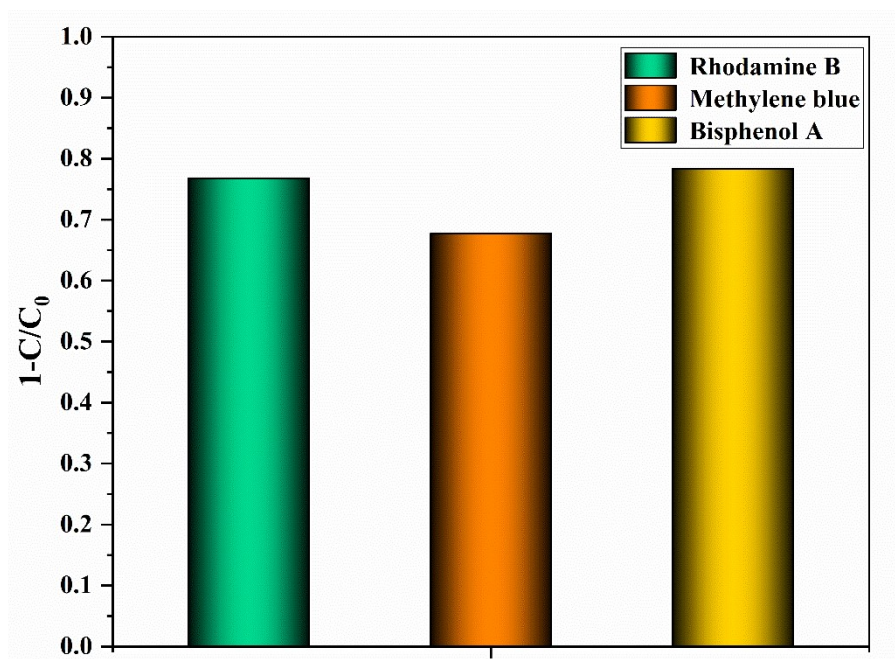

**Fig. S4** Degradation performance of CN<sub>30</sub> towards rhodamine B, methylene blue, bisphenol A.

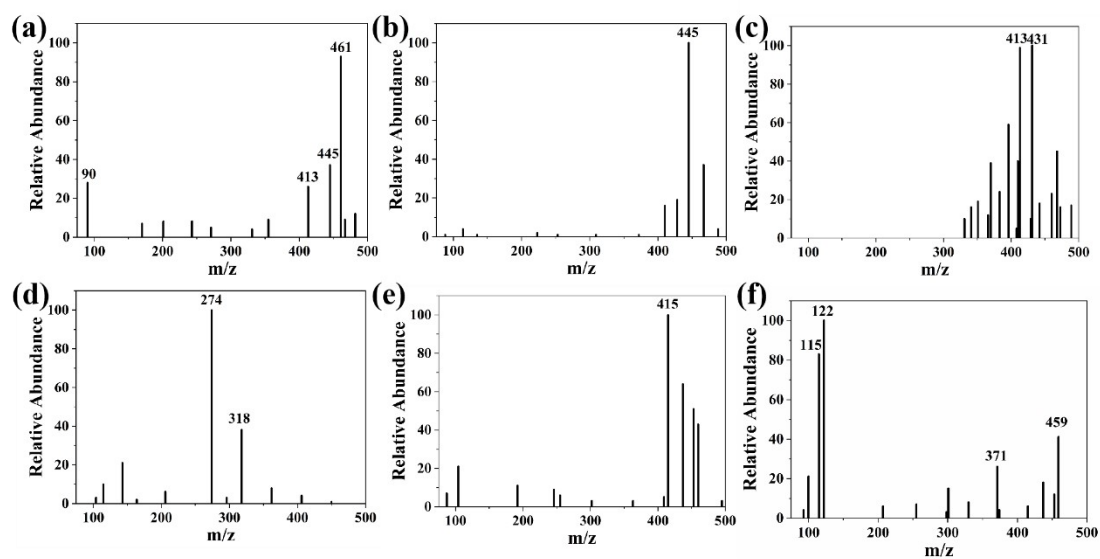

**Fig. S5** Mass spectra of the degradation of TC over CN<sub>30</sub> sample at (a) 2.56 min, (b) 3 min, (c) 6.37 min, (d) 6.84 min, (e) 8.29 min and (f) 8.79 min.
